# Supplementary material
Source: ML conference proceedings conference paper supplement (https://proceedings.mlr.press/v97/etmann19a.html)
Supplement: Supplementary file [file etmann19a-supp.pdf]

## Appendix

**Proof of Equation (3):** Note that

$$\begin{aligned} F(x+e) &\neq F(x) \\ \Leftrightarrow \langle x+e, z \rangle \langle x, z \rangle &< 0 \\ \Leftrightarrow \langle e, z \rangle &> |\langle x, z \rangle|. \end{aligned}$$

The left-hand side is clearly maximized for  $e = \|e\| \frac{z}{\|z\|}$ , leading to

$$\|e\| \|z\| > |\langle x, z \rangle|.$$

This proves the claim by taking the infimum over  $\|e\|$ .

**Lemma 1.** *Let  $F$  be a classifier with locally affine score function  $\Psi$ . Assume  $l(x) \geq \rho(x)$ . Then*

$$\rho(x) = \min_{j \neq i^*} \frac{\Psi^{i^*}(x) - \Psi^j(x)}{\|\nabla \Psi^{i^*}(x) - \nabla \Psi^j(x)\|}, \quad (8)$$

for  $i^* := F(x)$  the predicted class at  $x$ .

*Proof.* As  $l(x) \geq \rho(x)$ , we can take the infimum in (1) over all perturbations in the local affine component, i.e.  $e$  with  $\|e\| \leq l(x)$  only. This allows us to reformulate

$$\begin{aligned} F(x+e) &\neq F(x) \\ \Leftrightarrow \exists j \neq i^* : \Psi^j(x+e) &> \Psi^{i^*}(x+e) \\ \Leftrightarrow \exists j \neq i^* : \langle \nabla \Psi^j(x) - \nabla \Psi^{i^*}(x), e \rangle &> \Psi^{i^*}(x) - \Psi^j(x). \end{aligned}$$

The infimum over  $\|e\|$  is achieved by choosing  $e$  as a multiple of  $\nabla \Psi^j(x) - \nabla \Psi^{i^*}(x)$ . A direct computation then finishes the proof.  $\square$

### Proofs of Homogenization results

**Lemma 3** (Euler's Homogeneous Function Theorem). *Let  $f : \mathbb{R}^m \rightarrow \mathbb{R}$  be a positive one-homogeneous function that is continuously differentiable on  $\mathbb{R}^m \setminus \{0\}$ . Then*

$$f(x) = \langle \nabla f(x), x \rangle$$

*Proof.* First note that

$$\begin{aligned} \partial_i f(ax) &= \lim_{t \rightarrow 0} \frac{f(ax + te_i) - f(ax)}{t} \\ &= \lim_{t \rightarrow 0} \frac{f(ax + ate_i) - f(ax)}{at} = \partial_i f(x). \end{aligned}$$

Hence

$$f(x) = \int_0^1 \langle \nabla f(tx), x \rangle dt = \langle \nabla f(x), x \rangle$$

$\square$

**Lemma 2** (Linearized Robustness of Homogeneous Classifiers). *Consider a classifier  $F$  with positive one-homogeneous score functions. Then*

$$\tilde{\rho}(x) = \alpha^\dagger(x). \quad (12)$$

*Proof.* Direct consequence of 3.  $\square$

**Definition 5** (Neural Networks). *Define the class of neural networks  $\mathcal{N}$  to be any network built on learnable affine transforms (convolutional layers, dense layers) with linear weights  $\Theta$  and biases  $b$  and ReLU or leaky ReLU activations. The network can include arbitrary skip-connections, batch-normalization layers and max or average pooling layers of arbitrary window size. This in particular includes many state-of-the-art classification networks.*

**Lemma 4** (Homogeneous Networks). *For fixed  $x$ , consider the logit  $\Psi_{\Theta, b}^i(x)$  of a network  $\Psi_{\Theta, b} \in \mathcal{N}$ , where  $\Theta$  denotes the linear weights and  $b$  the bias vector of the network. Then the function*

$$f : y \mapsto \Psi_{\Theta, b}^i \left( \frac{\|y\|}{\|x\|} (y) \right),$$

*is positive one-homogeneous and  $f(x) = \Psi_{\Theta, b}^i(x)$ .*

*Proof.* Consider first a network consisting of a single layer with linear transform  $A$  and bias  $b$  with ReLU non-linearity. The associated network function is hence given by  $\Psi_{A, b}(x) = (Ax + b)_+$ . For this network, we compute for  $x$  fixed and any  $y$  and  $a > 0$  as

$$\begin{aligned} f(ay) &= \left( A(ay) + b \frac{\|ay\|}{\|x\|} \right)_+ \\ &= \left( a \cdot Ay + a \cdot b \frac{\|y\|}{\|x\|} \right)_+ = af(y). \end{aligned}$$

A single layer is hence positive one-homogeneous. A function consisting of compositions of positive one-homogeneous functions is positive one-homogeneous itself as well, the function  $f$  associated to a network consisting of affine transforms and ReLU activations is positive one-homogeneous. All of the operations skip-connections, batch-normalization layers and max or average pooling are positive one-homogeneous as well, thus proving the claim.  $\square$

**Theorem 1** (Homogeneous Decomposition of Neural Networks). *Let  $\Psi_{\Theta, b}^i$  be any logit of a neural network with ReLU activations (of class  $\mathcal{N}$  in the appendix). Denote by  $\Theta$  the linear filters and by  $b$  the bias terms of the network. Then*

$$\begin{aligned} \Psi_{\Theta, b}^i(x) &= \langle x, \nabla_x \Psi_{\Theta, b}^i(x) \rangle + \langle b, \nabla_b \Psi_{\Theta, b}^i(x) \rangle \\ &= \langle x, \nabla_x \Psi_{\Theta, b}^i(x) \rangle + \sum_k b_k \partial_{b_k} \Psi_{\Theta, b}^i(x). \end{aligned} \quad (13)$$

*Proof.* Let  $f$  be the functions associated with the network  $\Psi_{\Theta,b}^i$  as in Lemma 4. Then by Lemma 3 we can compute the value of  $f$  at the point  $x$  via

$$f(x) = \langle x, \nabla_y f(y)|_{y=x} \rangle.$$

Note that by construction  $f(x) = \Psi_{\Theta,b}^i(x)$ . We compute the gradient of  $f$  at the point  $x$  explicitly as

$$\nabla_y f(y)|_{y=x} = \nabla_x \Psi_{\Theta,b}^i(x) + \frac{x}{\|x\|^2} \langle b, \nabla_b \Psi_{\Theta,b}^i(x) \rangle.$$

Combining these results shows

$$\begin{aligned} f(x) &= \langle x, \nabla_x \Psi_{\Theta,b}^i(x) + \frac{x}{\|x\|^2} \langle b, \nabla_b \Psi_{\Theta,b}^i(x) \rangle \rangle \\ &= \langle x, \nabla_x \Psi_{\Theta,b}^i(x) \rangle + \langle b, \nabla_b \Psi_{\Theta,b}^i(x) \rangle. \end{aligned}$$

□

Recall the notation  $i^* = F(x)$  and  $j^*$  for the minimizer in  $j$  in (9).

**Theorem 2.** Let  $g := \nabla \Psi^{i^*}(x)$ . Furthermore, let  $g^\dagger := \nabla(\Psi^{i^*} - \Psi^{j^*})(x)$  and  $\beta^\dagger := \beta^{i^*}(x) - \beta^{j^*}(x)$ . Then

$$\tilde{\rho}(x) \leq \alpha^\dagger(x) + \frac{|\beta^\dagger|}{\|g^\dagger\|} \quad (14)$$

$$\leq \alpha(x) + \|x\| \cdot \|\bar{g}^\dagger - \bar{g}\| + \frac{|\beta^\dagger|}{\|g^\dagger\|}. \quad (15)$$

*Proof.* We have

$$\begin{aligned} \tilde{\rho}(x) &= \frac{\Psi^{i^*}(x) - \Psi^{j^*}(x)}{\|\nabla \Psi^{i^*}(x) - \nabla \Psi^{j^*}(x)\|} \\ &= \frac{\langle x, \nabla \Psi^{i^*}(x) - \nabla \Psi^{j^*}(x) \rangle + \beta^{i^*}(x) - \beta^{j^*}(x)}{\|\nabla \Psi^{i^*}(x) - \nabla \Psi^{j^*}(x)\|} \\ &= \left| \langle x, \bar{g}^\dagger \rangle + \frac{\beta^\dagger}{\|g^\dagger\|} \right| \leq \alpha^\dagger(x) + \frac{|\beta^\dagger|}{\|g^\dagger\|}, \end{aligned}$$

using the decomposition theorem and the triangle inequality. Further,

$$\begin{aligned} &\alpha^\dagger(x) + \frac{|\beta^\dagger|}{\|g^\dagger\|} \\ &= |\langle x, \bar{g}^\dagger \rangle| + \frac{|\beta^\dagger|}{\|g^\dagger\|} \\ &= |\langle x, \bar{g}^\dagger - \bar{g} + \bar{g} \rangle| + \frac{|\beta^\dagger|}{\|g^\dagger\|} \\ &\leq |\langle x, \bar{g} \rangle| + |\langle x, \bar{g}^\dagger - \bar{g} \rangle| + \frac{|\beta^\dagger|}{\|g^\dagger\|} \\ &\leq \alpha(x) + \|x\| \cdot \|\bar{g}^\dagger - \bar{g}\| + \frac{|\beta^\dagger|}{\|g^\dagger\|}, \end{aligned}$$

using the Cauchy-Schwarz inequality. □

**Theorem 3.** Let  $\xi := x + \frac{\beta^\dagger}{\|g^\dagger\|} \frac{g^\dagger}{\|g^\dagger\|}$  and  $\gamma := \nabla \Psi^{i^*}(\xi)$ , with  $g^\dagger$  and  $\beta^\dagger$  defined as in the previous theorem. Then

$$\tilde{\rho}(x) \leq \frac{|\langle \xi, \gamma \rangle|}{\|\gamma\|} + \|\xi\| \cdot \|\bar{g}^\dagger - \bar{\gamma}\|, \quad (16)$$

and if additionally  $F(x) = F(\xi)$ , then

$$\tilde{\rho}(x) \leq \alpha(\xi) + \|\xi\| \cdot \|\bar{g}^\dagger - \bar{\gamma}\|.$$

*Proof.* We have

$$\begin{aligned} \tilde{\rho}(x) &= \frac{\langle x, g^\dagger \rangle + \beta^\dagger \langle \frac{g^\dagger}{\|g^\dagger\|^2}, g^\dagger \rangle}{\|g^\dagger\|} \\ &= \frac{\langle x + \frac{\beta^\dagger}{\|g^\dagger\|} \frac{g^\dagger}{\|g^\dagger\|}, g^\dagger \rangle}{\|g^\dagger\|} \\ &= \langle \xi, \bar{g}^\dagger \rangle = \langle \xi, \bar{g}^\dagger - \bar{g} + \bar{g} \rangle \\ &\leq |\langle \xi, \bar{\gamma} \rangle| + \|\xi\| \cdot \|\bar{g}^\dagger - \bar{\gamma}\|, \end{aligned}$$

using the Cauchy-Schwarz inequality in the same way as in the last theorem. □

## MNIST Model Architecture

Here we describe the architecture that was used for the MNIST models.

|                                                |
|------------------------------------------------|
| Conv2D (3 × 3, 'same'), 32 feature maps, ReLU  |
| Max Pooling (factor 2)                         |
| Conv2D (3 × 3, 'same'), 64 feature maps, ReLU  |
| Max Pooling (factor 2)                         |
| Conv2D (3 × 3, 'same'), 128 feature maps, ReLU |
| Max Pooling (factor 2)                         |
| Dense Layer (128 neurons), ReLU                |
| Dropout (0.5)                                  |
| Softmax                                        |
